# Supplementary material
Source: PubMed Central journal article supplement (PMC1478198)
Supplement: 7601123s1.pdf [file 7601123s1.pdf]

**Supplemental Figure 1.** ATRIP translocation to sites of UV damage and Chk1 S345 phosphorylation are increased in S-phase cells. (A) Asynchronous (AS) XPA-complemented cells were synchronized with a double thymidine block ( $t = 0$ ) and released. At the indicated times post-release, cells were UV treated and stained as in Figure 1A. Colocalization of ATRIP and CPD was determined as in Figure 1C. Error bars indicate standard error of three samples from a representative experiment ( $n = 3$ ) performed in triplicate. Percentage of S-phase cells was determined by flow cytometry by measuring BrdU incorporation. (B) XPA-complemented cells were left asynchronous (AS) or synchronized in S phase ( $t = 4$ ) as in (A), then mock-treated or exposed to 50 J/m<sup>2</sup> UV and allowed to recover for 1 hour. Equal amounts of cell lysate were resolved by SDS-PAGE and analyzed by western blot using the indicated antibodies.

**Supplemental Figure 2.** XPA is required for UV-induced Chk1 phosphorylation in XPA-deficient MEFs. NIH 3T3 cells or XPA<sup>-/-</sup> MEFs were mock treated or treated with 5, 15, or 50 J/m<sup>2</sup> of UV. Cells were harvested after one hour and lysates were resolved by SDS-PAGE and analyzed by western blot using phospho-serine 345 Chk1, Chk1, and ATRIP antibodies. The S phase fraction was determined as described in Figure 1D.
