# Supplementary material
Source: PubMed Central journal article supplement (PMC1478198)

# Supplemental Figure 1

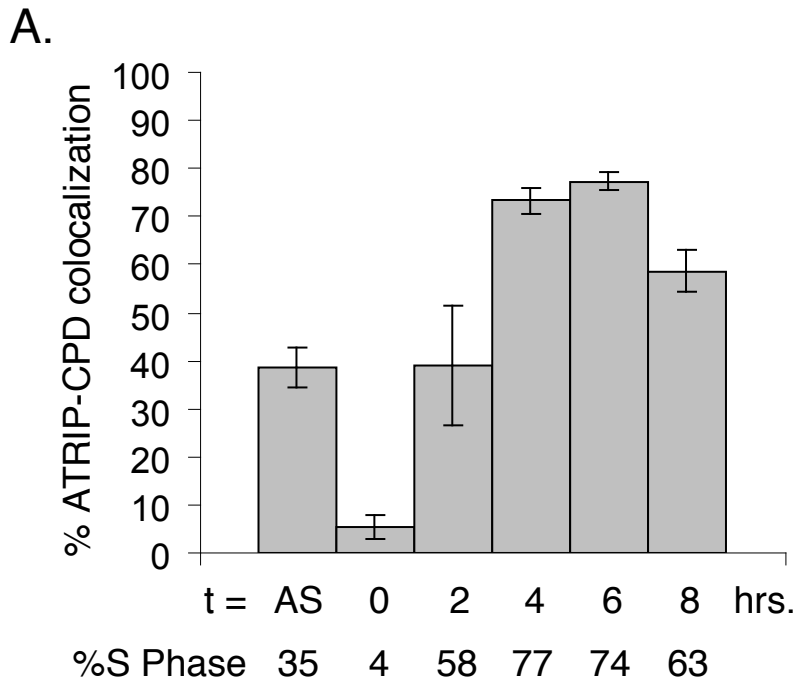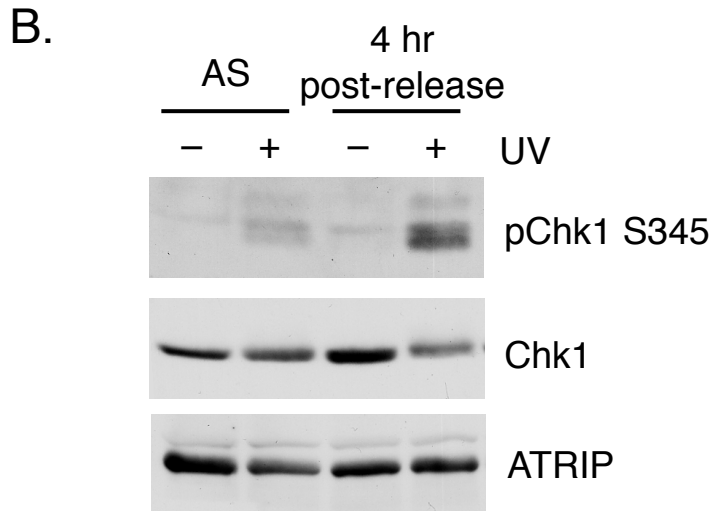

Supplement: 7601123s2.pdf [file 7601123s2.pdf]

## Supplemental Figure 2

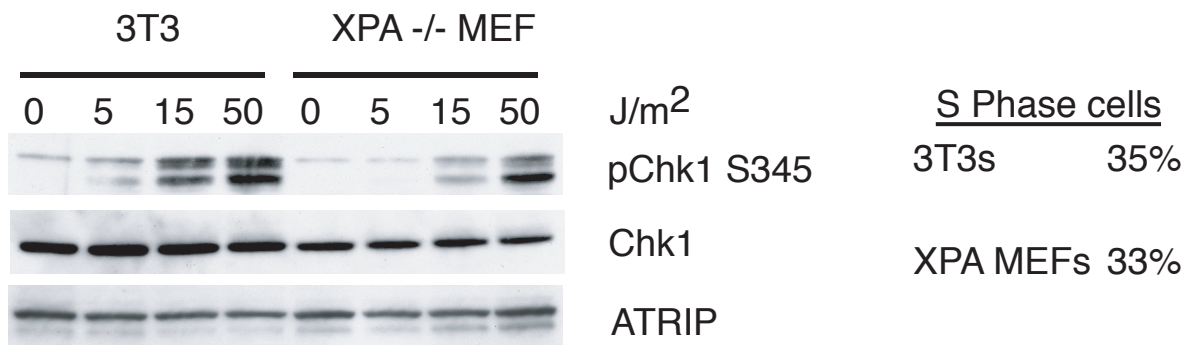

Supplement: 7601123s3.pdf [file 7601123s3.pdf]
